# Supplementary material for: A P4HA2-dominated hypoxia signature enables response stratification of multi-therapeutic response in cervical cancer
Source: Research Square preprint supplement (doi:10.21203/rs.3.rs-6832842/v1), 2025-06-17

Fig.6F Western blot results of HIF-1α protein expression in P4HA2 knockdown and untreated groups of SiHa and CasKi cells.

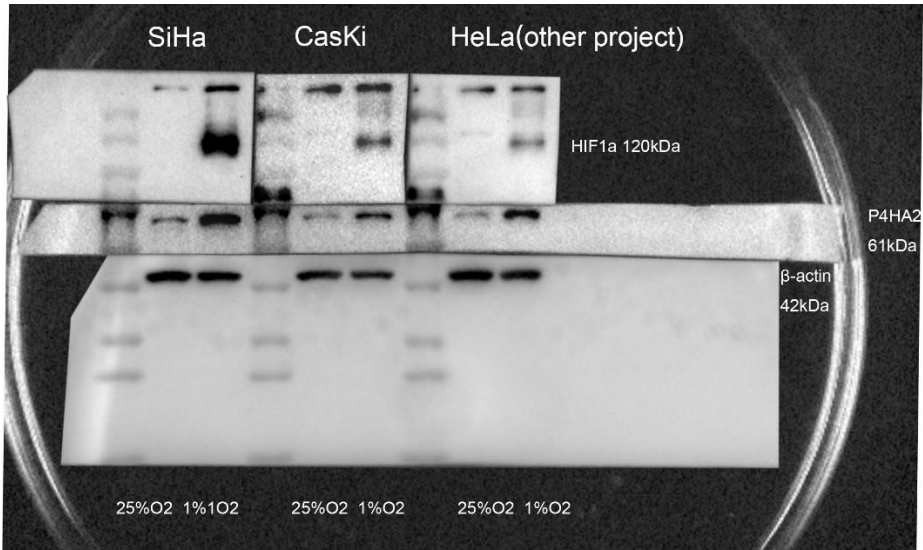

Fig.6G mRNA expression of HIF1A in SiHa and CasKi cells in P4HA2 knockdown and untreated groups of SiHa and CasKi cells.

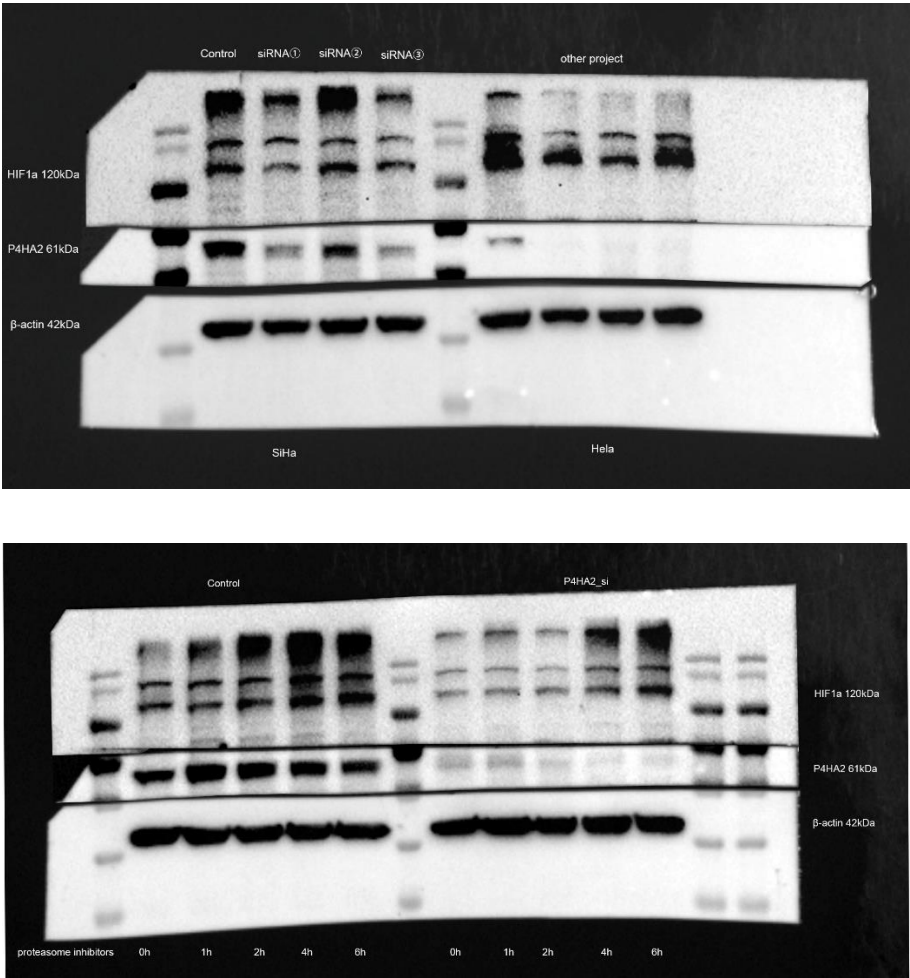

Fig.6I Western blot results of HIF-1 $\alpha$  protein expression in SiHa and CasKi cells treated with proteasome inhibitors for 0.1.2.4.6 hours after P4HA2 knockdown and control treatment for 48 hours

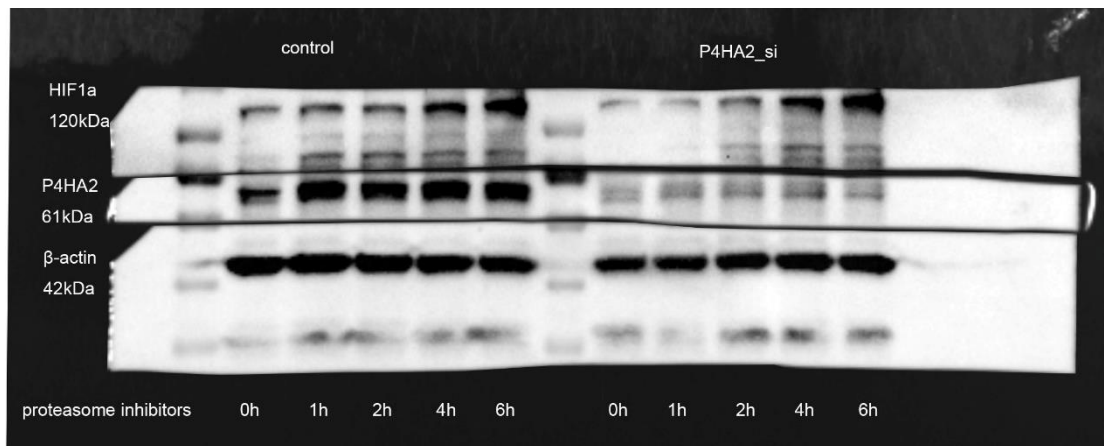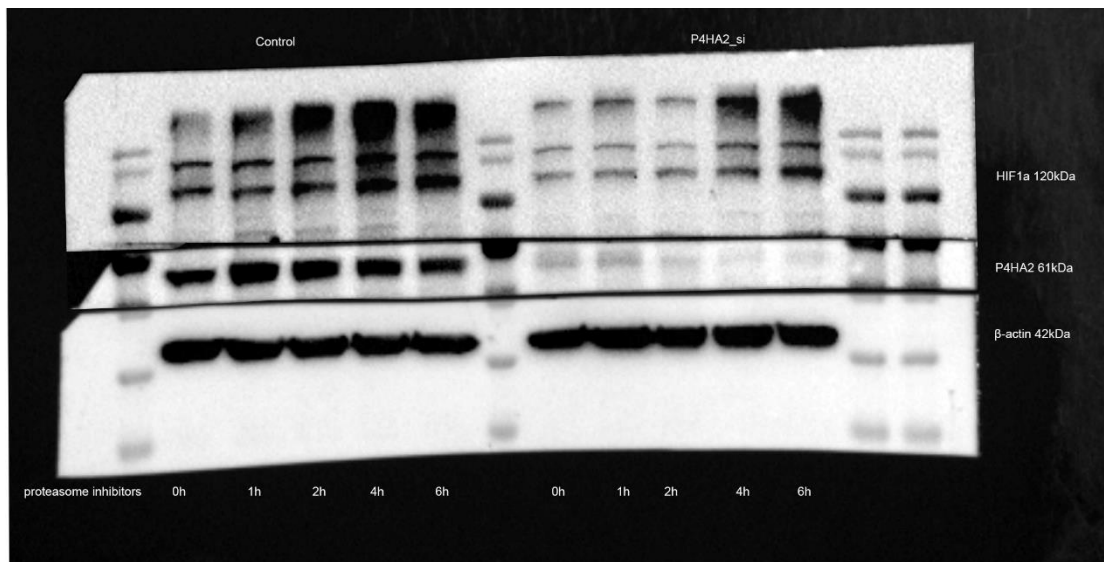

Supplement: Supplementary file 1 [file 768a17ffeacddd45dfa8dfd8.pdf]
